# Supplementary material for: Microfluidic device for expedited tumor growth towards drug evaluation
Source: Royal Society of Chemistry journal article supplement (doi:10.1039/c8lc01250d), 2019-01-01
Supplement: c8lc01250d1.pdf [file c8lc01250d1.pdf]

### Electronic Supplementary Information

|                          | Imaging Integration | Throughput | Media Circulation | Control over Drug Testing | Cost | Initial Number of Cells Required | Culturing Time Required |
|--------------------------|---------------------|------------|-------------------|---------------------------|------|----------------------------------|-------------------------|
| Hanging-Drop             | Hard                | Low        | No                | None                      | Low  | Low                              | Long                    |
| Animal Models            | Very Hard           | Low        | Yes               | Low                       | High | High                             | Long                    |
| NASA Bioreactor          | Hard                | High       | Yes               | Low                       | High | High                             | Long                    |
| Our Bilayer Microfluidic | Easy                | High       | Yes               | High                      | Low  | Low                              | Short                   |

**Advantages and improvements over existing methods:**

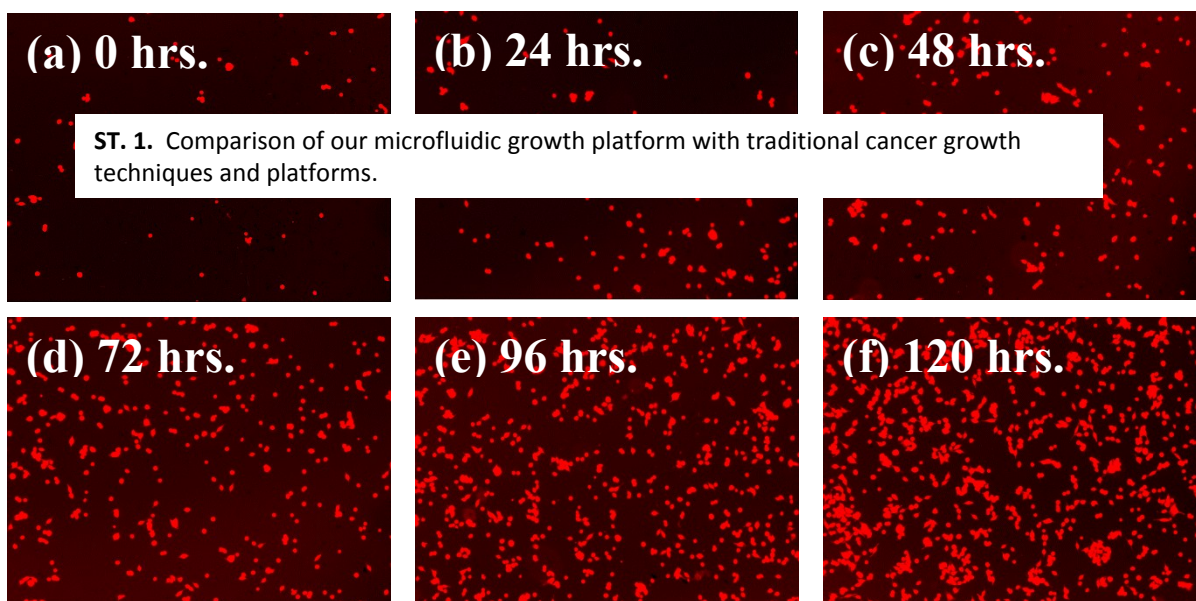

**SF. 1.** Representative fluorescent images of Leukemia cell static growth suspended in Matrigel stained with CellTrackerRed™. **a**, 0 hrs. **b**, 24 hrs. **c**, 48 hrs. **d**, 72 hrs. **e**, 96 hrs. **f**, 120 hrs. All white scale bars are 100µm in length.

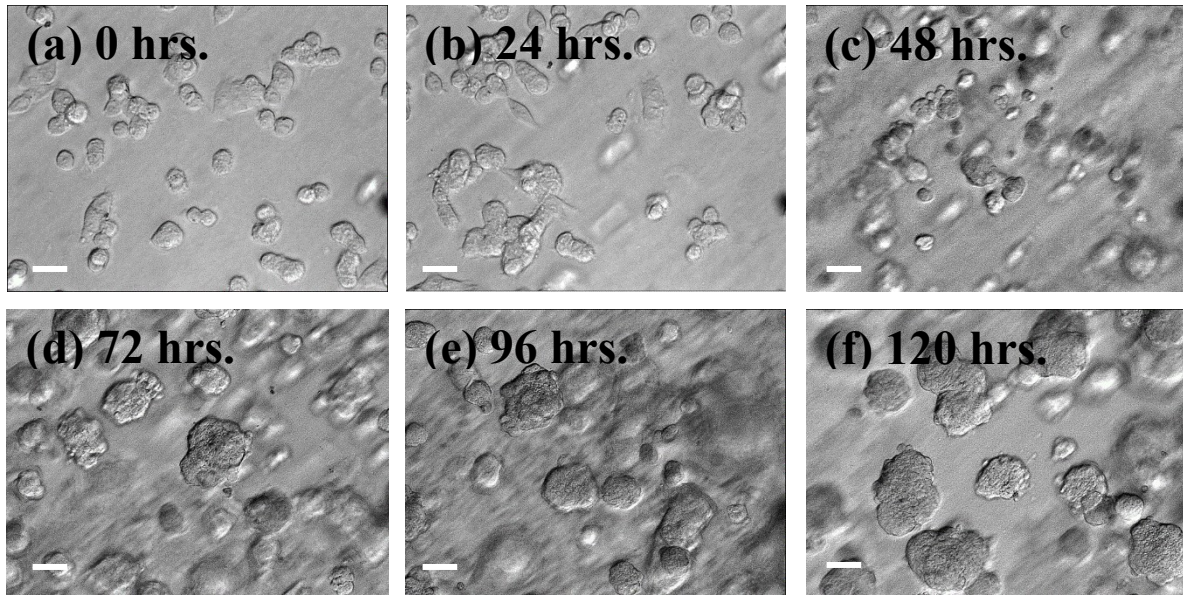

**SF. 2.** Representative brightfield images of HCT116 cell static growth suspended in Matrigel. **a**, 0 hrs. **b**, 24 hrs. **c**, 48 hrs. **d**, 72 hrs. **e**, 96 hrs. **f**, 120 hrs. All white scale bars are 100 $\mu$ m in length.

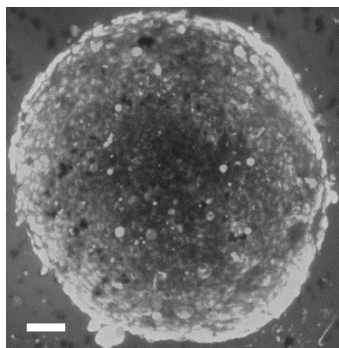

**SF. 3.** HCT116 tumor spheroid grown in microfluidic device displaying high degree of sphericity. White scale bar is 60 $\mu$ m in length.

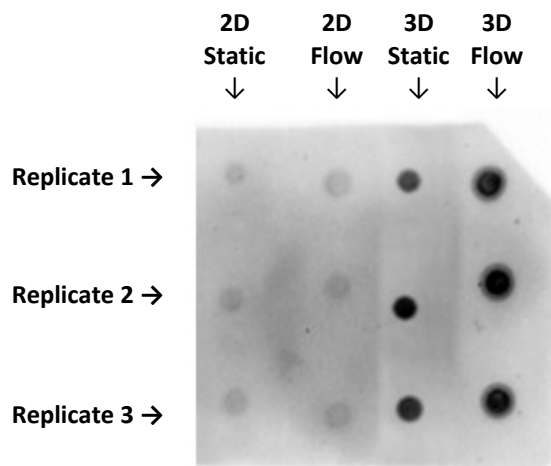

**SF. 4.** Dot plot testing results for E-Cadherin screening. Similar levels of E-Cadherin expression are observed for static and flow conditions for both two-dimensional and three dimensional cancer cell growth.

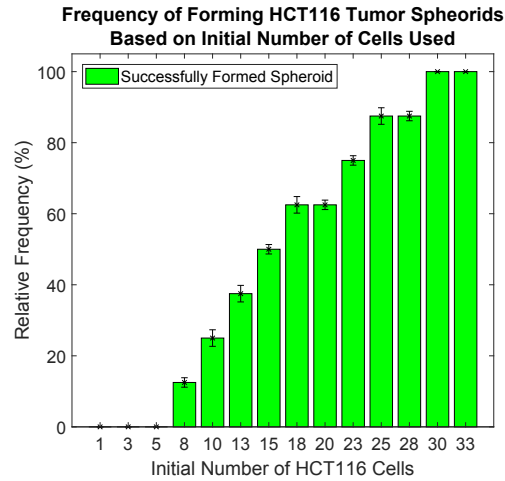

**SF. 5.** Relative frequency of HCT116 tumor spheroid formation based on the initial number of cancer cells introduced into the microfluidic device (n=24). No spheroid formation is observed between 1 and 5 cells. The smaller number of cells required to form a spheroid is 8 cells with roughly a 12.5% likelihood of success. Consistent (100%) spheroid formation occurs when using 30 cells or higher.
